# Supplementary material for: Deep defect level engineering: a strategy of optimizing the carrier concentration for high thermoelectric performance
Source: Royal Society of Chemistry journal article supplement (doi:10.1039/c8ee00112j), 2018-01-01
Supplement: c8ee00112j1.pdf [file c8ee00112j1.pdf]

## SUPPORTING INFORMATION

### **Deep defect level engineering: a strategy of optimizing the carrier concentration for high thermoelectric performance**

Qian Zhang,<sup>a\*</sup> Qichen Song,<sup>b</sup> Xinyu Wang,<sup>a</sup> Jingying Sun,<sup>c</sup> Qing Zhu,<sup>c</sup> Keshab Dahal,<sup>c</sup> Xi Lin,<sup>a</sup> Feng Cao,<sup>d</sup> Jiawei Zhou,<sup>b</sup> Shuo Chen,<sup>c</sup> Gang Chen,<sup>b</sup> Jun Mao<sup>c\*</sup>, and Zhifeng Ren<sup>c\*</sup>

*<sup>a</sup>Department of Materials Science and Engineering, Harbin Institute of Technology, Shenzhen, Guangdong 518055, P.R. China, E-mail: [zhangqf@hit.edu.cn](mailto:zhangqf@hit.edu.cn)*

*<sup>b</sup>Department of Mechanical Engineering, Massachusetts Institute of Technology, Cambridge, Massachusetts 02139, USA*

*<sup>c</sup>Department of Physics and TcSUH, University of Houston, Houston, Texas 77204, USA, E-mail: [maojunte@gmail.com](mailto:maojunte@gmail.com); [zren@uh.edu](mailto:zren@uh.edu)*

*<sup>d</sup>School of Science, Harbin Institute of Technology, Shenzhen, Guangdong 518055, P.R. China*

## Thermoelectric properties of I-doped PbTe

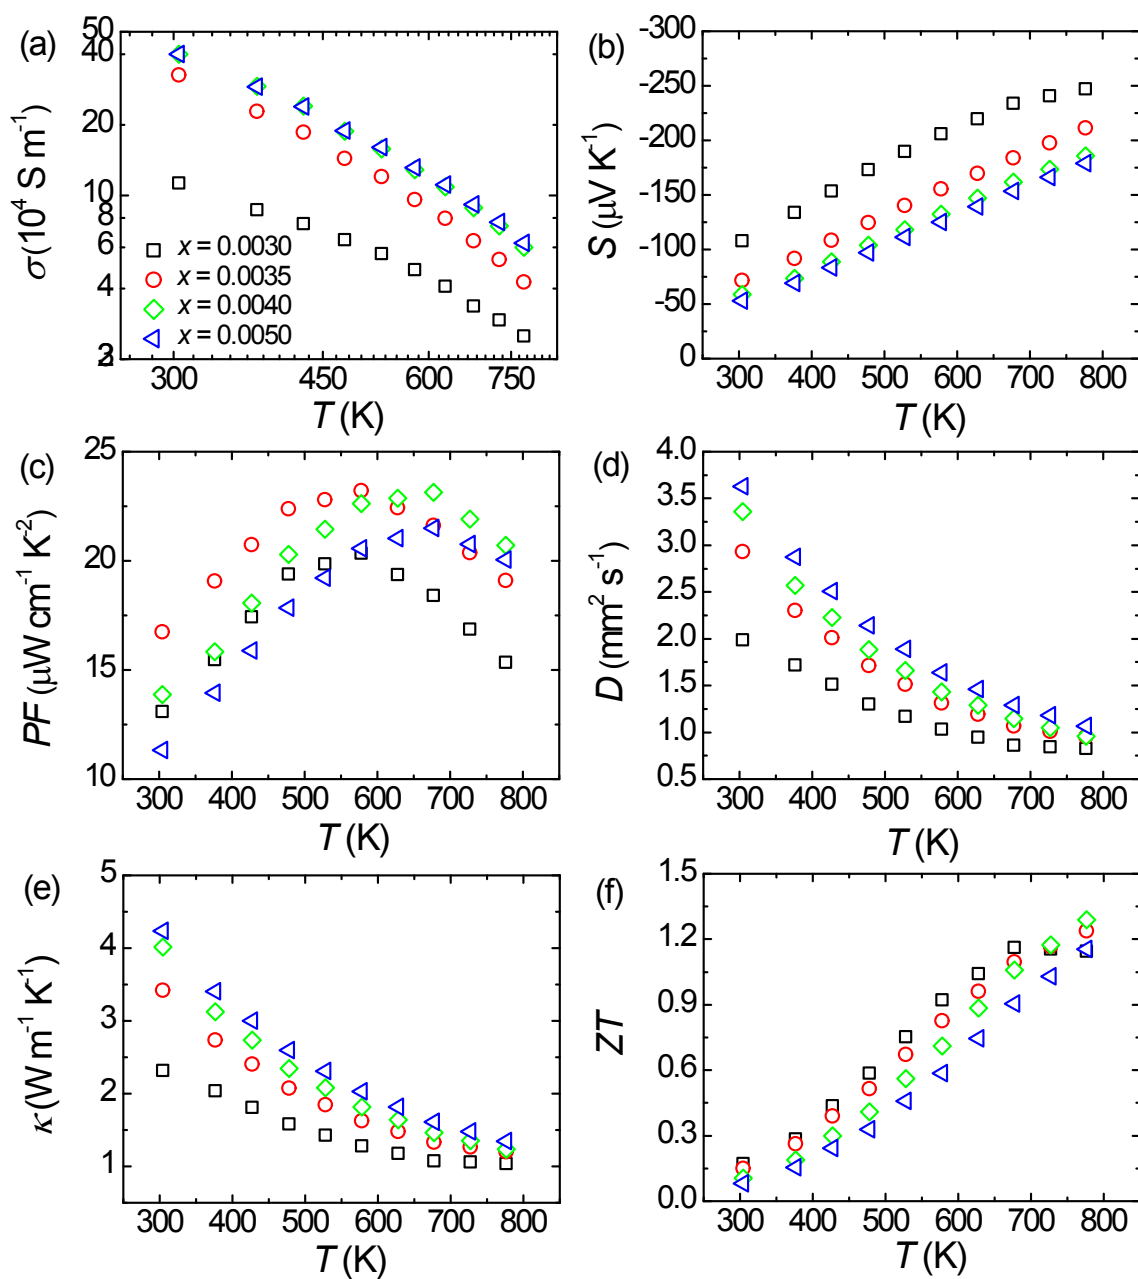

Figure S1. Thermoelectric properties of  $\text{PbTe}_{1-x}\text{I}_x$  ( $x = 0.003, 0.0035, 0.004, \text{ and } 0.005$ ). (a) Electrical conductivity, (b) Seebeck coefficient, (c) power factor, (d) thermal diffusivity, (e) thermal conductivity, and (f)  $ZT$ .

## Pisarenko plot

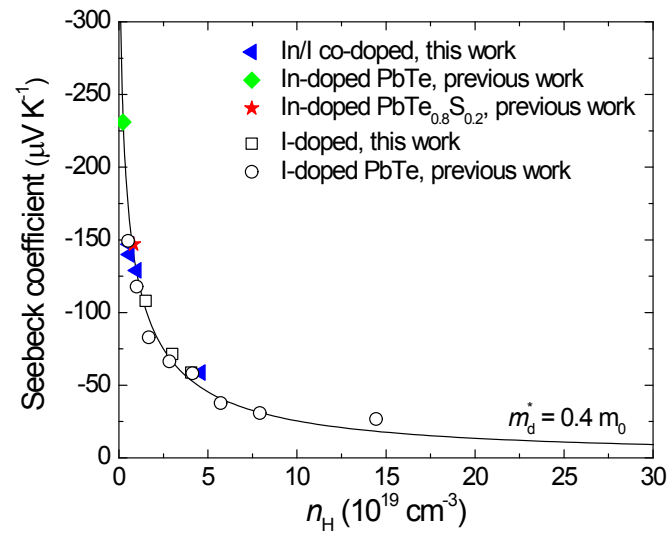

Figure S2. Pisarenko plot for the *n*-type PbTe-based materials.

## Hall mobility

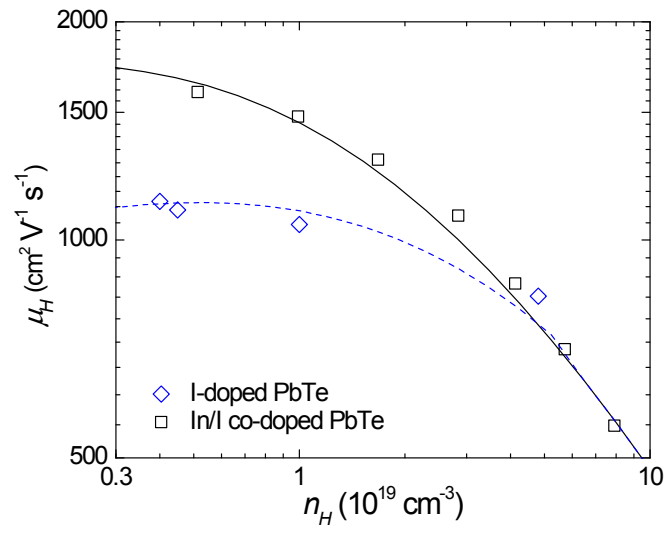

Figure S3. Relationship between the Hall carrier concentration and Hall carrier mobility of  $n$ -type PbTe.

### Specific heat and diffusivity of In/I co-doped PbTe

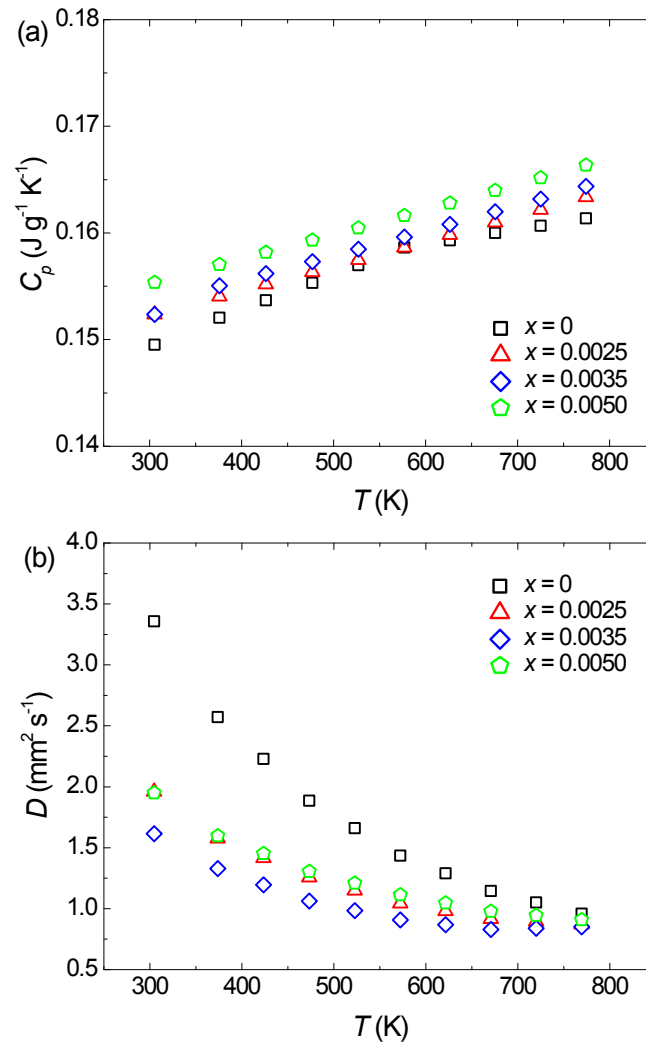

Figure S4. (a) Specific heat and (b) thermal diffusivity of In<sub>x</sub>Pb<sub>1-x</sub>Te<sub>0.996</sub>I<sub>0.004</sub> ( $x = 0, 0.0025, 0.0035,$  and  $0.0050$ ).

### Lattice thermal conductivity of In/I co-doped PbTe

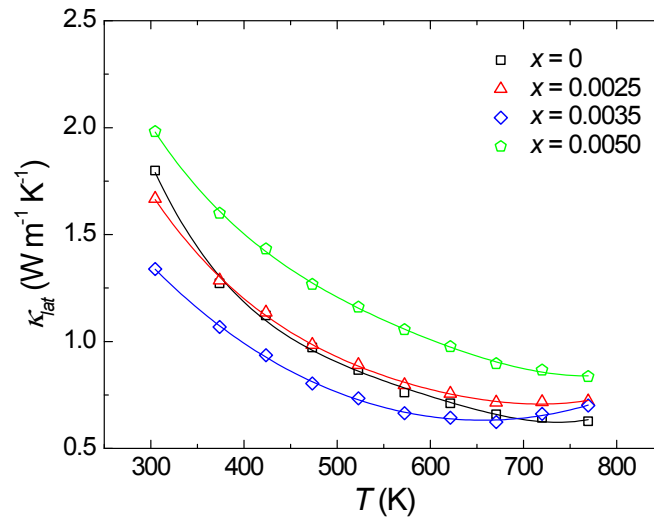

Figure S5. Temperature-dependent lattice thermal conductivity of In/I co-doped PbTe

The lattice thermal conductivity of the In/I co-doped PbTe is calculated as shown in Fig. S5. The lattice thermal conductivity shows a non-monotonic dependence on the indium concentration, which can be partially ascribed to the uncertainty in the estimation of the Lorenz number.

## XRD

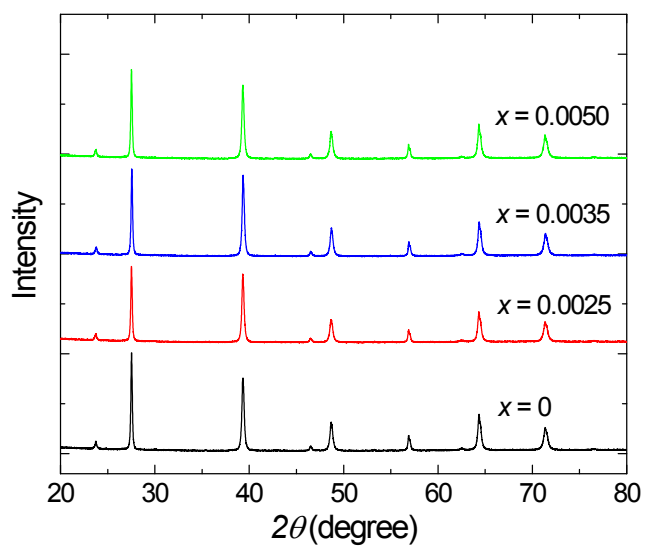

Figure S6. XRD patterns of  $\text{PbTe}_{1-x}\text{I}_x$  ( $x = 0.003, 0.0035, 0.004, \text{ and } 0.005$ ).

## Details for calculation

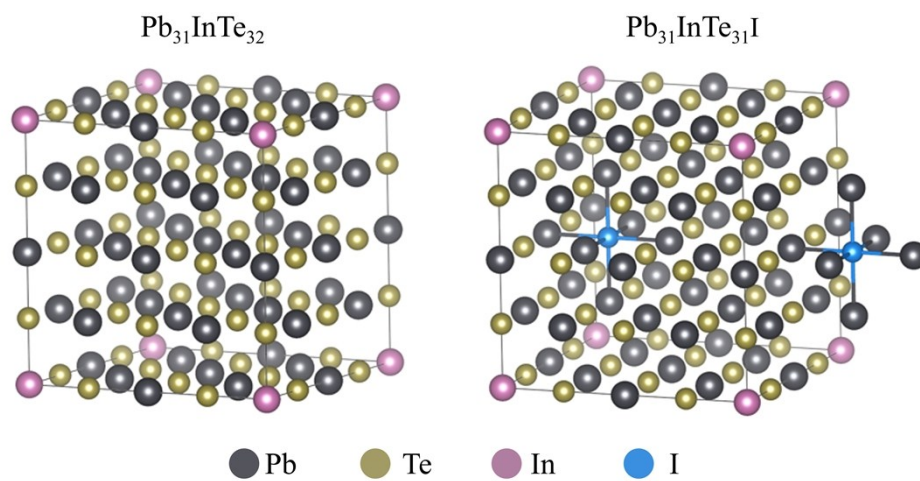

Figure S7. The structures of the supercell used in the calculation (a)  $\text{Pb}_{31}\text{InTe}_{32}$ , and (b)  $\text{Pb}_{31}\text{InTe}_{31}\text{I}$
